# Supplementary material for: The Relationship between Native American Ancestry, Body Mass Index and Diabetes Risk among Mexican-Americans
Source: PLoS One. 2015 Oct 26;10(10):e0141260. doi: 10.1371/journal.pone.0141260 (PMC4621045; doi:10.1371/journal.pone.0141260)
Supplement: S2 Table — (XLSX) [file pone.0141260.s003.xlsx]

## Sheet: Sheet1
Ethnicities	Ancestry fraction cutoff
	0.85	0.9	0.95
Europeans	1	0.988235	0.788235
Yoruba	1	1	0.852273
S2 table. Proportion of individuals in the 1000 Genome Project corrected predicted by our admixture model under different ancestry fraction cutoffs.
